# Supplementary material for: SARS-CoV-2 infection triggers widespread host mRNA decay leading to an mRNA export block
Source: RNA. 2021 Nov;27(11):1318–29. doi: 10.1261/rna.078923.121 (PMC8522697; doi:10.1261/rna.078923.121)
Supplement: Supplemental Material [file supp_078923.121_Supplemental_Table_1.xlsx]

## Sheet: Sheet1
SARS-CoV-2 ORF1a			SARS-CoV-2 ORF1b			SARS-CoV-2 N
tgagttggacgtgtgttttc			tctgccattgtgtatttagt			atgcagctacagttgtgatg
gcgaacctgtaaaacaggca			tcataccagtcctttttatt			gaataggacacgggtcatca
acgcctttttcaacttctac			ttcacctaagttggcgtata			tgattttctagctcctactc
ccataacatgaccatgaggt			cgcatggcatcacagaattg			catccacgcacaattcaatt
tactgaatgccttcgagttc			gtacaccaacaataccagca			atgggtgatttagaaccagc
cctttattaccgttcttacg			ccgaaatcataccagttacc			ggttcctggcaattaattgt
aatgcactcaagagggtagc			ctggcgtggtttgtatgaaa			gcactacaagactacccaat
ccagttgttcggacaaagtg			tctacaacaggaactccact			cacgaacgtcatgatactct
tttcagaacgttccgtgtac			ccctggtcaaggttaatata			tgattttggggtccattatc
tggtgacgcaactggataga			caacatgtgactctgcagtt			agggtccaccaaacgtaatg
gaaaggcacatttggttgca			cccacttaatgtaaggcttt			tggttactgccagttgaatc
tggctttaacaaaatcgccc			tctcttccgtgaagtcatat			ttattgggtaaaccttgggg
ggcaccttctttagtcaaat			atttgggtggtatgtctgat			tgagagcggtgaaccaagac
gcattttggggtaagtaacc			tgcagaatgcatctgtcatc			cctcgagggaatttaaggtc
agaacacacagcctccaaag			gtaggtgggaacactgtaga			ttggtgttaattggaacgcc
cctgtatggttacaacctat			tttctcactagtggtccaaa			aatttggtcatctggactgc
cattaagaccttcggaacct			caacacctagctctctgaag			accacgaattcgtctggtag
actgaacaacaccacctgta			gtcagcagcatacacaagta			gatctttcattttaccgtca
tcaaggacgggtttgagttt			tagattaccagaagcagcgt			ccagttcctaggtagtagaa
accttccttaaacttctctt			acgtagtgcgtttatctagt			tttgttagcaccatagggaa
gaatgtctgaacactctcct			ccgggtttgacagtttgaaa			cagttgcaacccatatgatg
acttctgtgggaagtgtttc			agaaacccttagacacagca			ccaatgtgatcttttggtgt
acagcttcactagtaggttg			tcaacagaacttccttcctt			gattgcagcattgttagcag
acaaactggtgtaccaacca			atcgctgatagcagcattac			ttccttgaggaagttgtagc
tgtgtctttgatttcgagca			aatacagccaccatcgtaac			tagaagccttttggcaatgt
atcatattaggtgcaagggc			tgacgatgacttggttagca			acgagaagaggcttgactgc
aagtaacctttgttggtgca			aaccagctgatttgtctagg			actgttgcgactacgtgatg
ctcatttacttctgtaccga			aataaagtctagccttaccc			tgcctggagttgaatttctt
tggctcaaactcttcttctt			gcatcttgatcctcataact			attctagcaggagaagttcc
ggttgaagagcagcagaagt			gagctctattctttgcacta			agcaaagcaagagcagcatc
aatcttcttcttgctcttct			agatagagacaccagctacg			ctggttcaatctgtcaagca
gtcttgttgaccaacagttt			tggcggctattgatttcaat			ttaccagacattttgctctc
cactgttggttttacctttt			ccatagaatttgcttgttcc			gcagcagatttcttagtgac
cttatttaaggctcctgcaa			gtttttaacatgttgtgcca			ttgccgaggcttcttagaag
caactaccacccactttaag			gtgagggttttctacatcac			tatgctttagtggcagtacg
acctttgttaacatttgggc			atttaggataatcccaaccc			gccgaaagcttgtgttacat
acttgcttttcactcttcat			tctaagcatgttaggcatgg			aatttccttgggtttgttct
cacagcagttaaaacaccct			gagcaagaacaagtgaggcc			cttgtctgattagttcctgg
ttggcacttttctcaaagct			cggtgtgacaagctacaaca			ggccaatgtttgtaatcagt
tacatagccaagtggcattg			acttgagcacactcattagc			tgggggcaaattgtgcaatt
gcttcttccaaatttaagcc			acacatgaccatttcactca			cgacattccgaagaacgctg
ctagttgtgtagattgtcca			ttccacctggtttaacatat			aatttgatggcacctgtgta
acacttttatcacctctctt			ttagcataagcagttgtggc			ggtgggaatgttttgtatgc
tctaggtggaatgtggtagg			aagtgcattaacattggccg			cttcttctttttgtcctttt
atgtcattgacatgtccaca			cggcaattttgttaccatca			ggtaaggcttgagtttcatc
gctccatccaaataagttgg			agtctgtgtcaacatctcta			gaagagtcacagtttgctgt
gtggtagtactcaaaagcct			cacaacagcatcgtcagaga			atcatccaaatctgcagcag
gggtatttccactttttagt			cactagaccttgagatgcat			gctcatggattgttgcaatt
